# Supplementary material for: Diarylethene–dihydroazulene multimode photochrome: a theoretical spectroscopic investigation
Source: Royal Society of Chemistry journal article supplement (doi:10.1039/c1cp21007f), 2011-01-01

# **Diarylethene-Dihydroazulene Multimode Photochromes: a theoretical spectroscopic investigation.**

## **Supporting Information**

Aurélie Perrier, François Maurel and Denis Jacquemin

## **1. Cartesian coordinates for Do-DHA**

|    |          |          |          |
|----|----------|----------|----------|
| 6  | 0.79351  | 0.10015  | 0.23239  |
| 6  | -0.22794 | -0.78552 | 0.09987  |
| 6  | -1.64313 | -0.55081 | -0.16098 |
| 6  | -2.11734 | 0.29364  | -1.14041 |
| 6  | -2.70141 | -1.211   | 0.55031  |
| 16 | -3.84421 | 0.2873   | -1.15533 |
| 6  | -3.9486  | -0.85794 | 0.14154  |
| 1  | -2.53702 | -1.90814 | 1.36319  |
| 6  | 0.69077  | 1.5619   | 0.27174  |
| 6  | -0.16838 | 2.26203  | 1.08315  |
| 6  | 1.51049  | 2.41846  | -0.53416 |
| 16 | 0.02784  | 3.96226  | 0.83619  |
| 6  | 1.26737  | 3.74499  | -0.35702 |
| 1  | 2.243    | 2.04495  | -1.24048 |
| 6  | 2.06984  | -0.58757 | 0.3633   |
| 6  | 0.30969  | -2.22736 | 0.23774  |
| 6  | 1.87042  | -2.06696 | 0.19282  |
| 6  | -1.16202 | 1.75614  | 2.07196  |
| 1  | -0.84379 | 0.78878  | 2.467    |
| 1  | -1.27623 | 2.44634  | 2.9112   |
| 1  | -2.14533 | 1.61191  | 1.61152  |
| 6  | -1.36795 | 1.11406  | -2.13226 |
| 1  | -1.91222 | 1.18591  | -3.077   |
| 1  | -1.18826 | 2.12924  | -1.76333 |
| 1  | -0.3932  | 0.66437  | -2.33351 |
| 6  | -5.26486 | -1.32375 | 0.66364  |
| 1  | -5.85648 | -1.81658 | -0.11385 |
| 1  | -5.10594 | -2.04148 | 1.47094  |
| 1  | -5.86129 | -0.49634 | 1.06001  |
| 6  | 1.91054  | 4.90907  | -1.03122 |
| 1  | 2.66226  | 4.55408  | -1.73936 |
| 1  | 1.18392  | 5.51104  | -1.58539 |
| 1  | 2.40848  | 5.56926  | -0.31445 |
| 6  | -0.07373 | -2.78551 | 1.54159  |
| 7  | -0.35137 | -3.19008 | 2.58406  |
| 6  | -0.21737 | -3.09833 | -0.81607 |
| 7  | -0.61197 | -3.76876 | -1.66499 |
| 6  | 3.28071  | -0.06529 | 0.66631  |
| 1  | 3.3359   | 0.98806  | 0.92869  |
| 6  | 2.55355  | -2.45537 | -1.08312 |
| 1  | 1.96169  | -2.7905  | -1.92986 |
| 6  | 4.5078   | -0.8071  | 0.63891  |
| 1  | 5.33074  | -0.4044  | 1.22418  |
| 6  | 4.78321  | -1.86437 | -0.17522 |
| 1  | 5.80555  | -2.23371 | -0.17998 |
| 6  | 3.89572  | -2.41596 | -1.1661  |
| 1  | 4.3611   | -2.81522 | -2.06441 |
| 1  | 2.32707  | -2.61428 | 1.0251   |

## **2. Cartesian coordinates for Dc-DHA**

|    |          |          |          |
|----|----------|----------|----------|
| 6  | 0.7617   | 0.58905  | 0.22629  |
| 6  | 0.42129  | -0.82537 | 0.14479  |
| 6  | -0.8263  | -1.27055 | -0.11529 |
| 6  | -1.86621 | -0.2177  | -0.49834 |
| 6  | -1.37615 | -2.59328 | -0.12948 |
| 16 | -3.49587 | -1.05918 | -0.25542 |
| 6  | -2.72617 | -2.63688 | -0.19066 |
| 1  | -0.77813 | -3.49337 | -0.05608 |
| 6  | -0.23712 | 1.52195  | 0.22783  |
| 6  | -1.67072 | 1.01476  | 0.39173  |
| 6  | -0.18593 | 2.94322  | 0.13421  |
| 16 | -2.74303 | 2.44218  | -0.09118 |
| 6  | -1.38719 | 3.54873  | -0.03807 |
| 1  | 0.7329   | 3.51464  | 0.13086  |
| 6  | 2.20271  | 0.726    | 0.28949  |
| 6  | 1.68149  | -1.64728 | 0.40995  |
| 6  | 2.84657  | -0.63114 | 0.14674  |
| 6  | -1.91077 | 0.7424   | 1.88562  |
| 1  | -2.94545 | 0.45201  | 2.07197  |
| 1  | -1.25338 | -0.05763 | 2.23611  |
| 1  | -1.6907  | 1.64831  | 2.45347  |
| 6  | -1.70984 | 0.0722   | -1.99857 |
| 1  | -1.79346 | -0.86372 | -2.55425 |
| 1  | -2.47945 | 0.76057  | -2.34925 |
| 1  | -0.72766 | 0.51039  | -2.19642 |
| 6  | -3.58335 | -3.85128 | -0.19216 |
| 1  | -4.16836 | -3.9134  | -1.11556 |
| 1  | -2.9722  | -4.75108 | -0.10503 |
| 1  | -4.29381 | -3.83058 | 0.64058  |
| 6  | -1.63932 | 5.00473  | -0.19838 |
| 1  | -0.69893 | 5.55854  | -0.19905 |
| 1  | -2.16658 | 5.21182  | -1.13532 |
| 1  | -2.26631 | 5.38378  | 0.61548  |
| 6  | 1.70174  | -2.04922 | 1.82405  |
| 7  | 1.69976  | -2.33201 | 2.94084  |
| 6  | 1.79034  | -2.84737 | -0.42087 |
| 7  | 1.87833  | -3.78386 | -1.08528 |
| 6  | 2.99578  | 1.81208  | 0.49405  |
| 1  | 2.54368  | 2.7507   | 0.79712  |
| 6  | 3.4468   | -0.65701 | -1.2211  |
| 1  | 2.99917  | -1.26668 | -2.0008  |
| 6  | 4.41208  | 1.81522  | 0.31181  |
| 1  | 4.95948  | 2.61601  | 0.80324  |
| 6  | 5.11846  | 1.0349   | -0.56326 |
| 1  | 6.1702   | 1.27458  | -0.69723 |
| 6  | 4.55785  | 0.06857  | -1.46292 |
| 1  | 5.05899  | -0.05966 | -2.41958 |
| 1  | 3.63934  | -0.76258 | 0.89163  |

### **3. Cartesian coordinates for Dc-VHF**

|   |               |               |               |
|---|---------------|---------------|---------------|
| C | 0.8731690677  | 0.8062611486  | 0.0364669174  |
| C | 0.5339067014  | -0.6201666583 | 0.2083964192  |
| C | -0.7643548014 | -1.0142239839 | 0.0737881378  |
| C | -1.8099148807 | 0.0077466839  | -0.3613805948 |
| C | -1.3454177855 | -2.296548957  | 0.3402014491  |
| S | -3.4401152614 | -0.7516816317 | 0.0718119413  |
| C | -2.6950991927 | -2.3189609378 | 0.3737753483  |
| H | -0.753128885  | -3.183838622  | 0.5275628759  |
| C | -0.1156438978 | 1.7549203095  | 0.0572542676  |
| C | -1.5275331704 | 1.3045645411  | 0.4143397874  |
| C | -0.066298034  | 3.1336733883  | -0.303174661  |
| S | -2.6334448543 | 2.700140419   | -0.0838708732 |
| C | -1.2749536273 | 3.7421629513  | -0.4135689685 |
| H | 0.8512024122  | 3.659926681   | -0.5353234524 |
| C | -1.6287401915 | 1.1573169212  | 1.9396001759  |
| H | -2.6414530179 | 0.8765779662  | 2.23265676    |
| H | -0.935486241  | 0.3907181285  | 2.2923658921  |
| H | -1.3738418353 | 2.1072256924  | 2.4134288378  |
| C | -1.7684396891 | 0.1767363731  | -1.8853954959 |
| H | -1.9006444254 | -0.7998278614 | -2.3545027542 |
| H | -2.5605988584 | 0.8420356884  | -2.2333565241 |
| H | -0.8023500937 | 0.5827431702  | -2.1978643369 |
| C | -3.5730881173 | -3.4879397957 | 0.6413660012  |
| H | -4.2331932165 | -3.6854710556 | -0.2097953081 |
| H | -2.9712571817 | -4.3787106333 | 0.8285289865  |
| H | -4.2124864927 | -3.3099809826 | 1.512323999   |
| C | -1.5237704198 | 5.1586553506  | -0.7894282982 |
| H | -0.5840977102 | 5.6726700298  | -0.997213308  |
| H | -2.1613160722 | 5.2213349119  | -1.6767119918 |
| H | -2.0410376497 | 5.687630948   | 0.0174086121  |
| C | 1.6532804058  | -1.5157177682 | 0.513770908   |
| C | 2.5492854079  | -1.1698608901 | 1.539306487   |
| C | 1.7366716663  | -2.8058402514 | -0.0316066454 |
| N | 3.2859603008  | -0.8282110187 | 2.3716633317  |
| N | 1.804916232   | -3.8601588058 | -0.5175699328 |
| C | 2.2767112425  | 1.0846412457  | -0.2505298954 |
| C | 2.9156305379  | 2.1470327027  | 0.3762698565  |
| C | 2.8961131455  | 0.1275896824  | -1.1126938591 |
| C | 4.2592539106  | 2.5385395816  | 0.342693035   |
| H | 2.280679912   | 2.7472095326  | 1.0213230626  |
| H | 2.2170838563  | -0.4943325797 | -1.6821452335 |
| C | 4.2469046967  | -0.0295803242 | -1.4054139214 |
| H | 4.4895800786  | 3.4394860658  | 0.9039213823  |
| C | 5.3403670473  | 1.8958220168  | -0.2322815929 |
| H | 4.4768134245  | -0.857553866  | -2.0704217928 |
| C | 5.3376558996  | 0.7197572564  | -0.9854332161 |
| H | 6.3108338803  | 2.3556698104  | -0.0710049002 |
| H | 6.3076196969  | 0.3767606259  | -1.3330540646 |

#### **4. Cartesian coordinates for Do-VHFcis**

|   |          |          |          |
|---|----------|----------|----------|
| C | 0.79075  | -0.07202 | 0.10605  |
| C | -0.1992  | -1.12519 | 0.11298  |
| C | -1.56263 | -0.83344 | -0.36043 |
| C | -1.85644 | -0.26692 | -1.57987 |
| C | -2.73775 | -1.12467 | 0.40705  |
| S | -3.56311 | -0.09187 | -1.76273 |
| C | -3.89865 | -0.77007 | -0.20118 |
| H | -2.70753 | -1.57229 | 1.3932   |
| C | 0.2883   | 1.29511  | 0.38888  |
| C | -0.36003 | 1.64935  | 1.54568  |
| C | 0.41947  | 2.398    | -0.51877 |
| S | -0.82163 | 3.31703  | 1.49956  |
| C | -0.13162 | 3.55842  | -0.07305 |
| H | 0.90972  | 2.31707  | -1.48255 |
| C | 2.15463  | -0.26922 | -0.15951 |
| C | 0.0448   | -2.38565 | 0.64908  |
| C | 3.07131  | 0.79511  | 0.17429  |
| C | -0.67619 | 0.8138   | 2.73912  |
| H | -0.04197 | -0.07498 | 2.75496  |
| H | -0.50629 | 1.36308  | 3.66898  |
| H | -1.72081 | 0.48474  | 2.73312  |
| C | -0.95054 | 0.11616  | -2.69998 |
| H | -1.19519 | -0.43767 | -3.61156 |
| H | -1.02593 | 1.18365  | -2.92704 |
| H | 0.08636  | -0.10051 | -2.44051 |
| C | -5.29499 | -0.89822 | 0.30381  |
| H | -5.90697 | -1.52249 | -0.3543  |
| H | -5.28624 | -1.36221 | 1.29215  |
| H | -5.787   | 0.07539  | 0.39098  |
| C | -0.1954  | 4.88349  | -0.75377 |
| H | 0.31709  | 4.82789  | -1.71662 |
| H | -1.22805 | 5.19478  | -0.93962 |
| H | 0.28447  | 5.66897  | -0.16183 |
| C | 1.205    | -2.68829 | 1.40683  |
| N | 2.13793  | -2.95846 | 2.03617  |
| C | -0.86164 | -3.46985 | 0.49833  |
| N | -1.55763 | -4.38726 | 0.38655  |
| C | 2.60431  | -1.46206 | -0.83374 |
| H | 1.806    | -2.13378 | -1.13322 |
| C | 4.42473  | 0.87986  | 0.06567  |
| H | 4.85532  | 1.80126  | 0.44989  |
| C | 3.84925  | -1.87746 | -1.18935 |
| H | 3.8801   | -2.83017 | -1.71146 |
| C | 5.12294  | -1.26771 | -0.99089 |
| H | 5.97733  | -1.84398 | -1.33433 |
| C | 5.37678  | -0.05313 | -0.4407  |
| H | 6.41659  | 0.25467  | -0.37742 |
| H | 2.59549  | 1.65673  | 0.63081  |

## **5. Cartesian coordinates for Do-VHFtrans**

|    |          |          |          |
|----|----------|----------|----------|
| 6  | 0.49931  | 0.28688  | -0.18395 |
| 6  | -0.33365 | -0.88709 | -0.36559 |
| 6  | -1.72479 | -0.86197 | 0.107    |
| 6  | -2.81759 | -1.35007 | -0.58048 |
| 6  | -2.08437 | -0.26942 | 1.36222  |
| 16 | -4.25932 | -1.07629 | 0.32635  |
| 6  | -3.41237 | -0.31917 | 1.63879  |
| 1  | -1.35566 | 0.16018  | 2.0391   |
| 6  | 1.90541  | 0.04563  | 0.19896  |
| 6  | 2.99715  | 0.56741  | -0.4536  |
| 6  | 2.27988  | -0.79568 | 1.2985   |
| 16 | 4.46129  | 0.03673  | 0.29384  |
| 6  | 3.62109  | -0.8984  | 1.48975  |
| 1  | 1.5583   | -1.3048  | 1.92784  |
| 6  | -0.00143 | 1.59342  | -0.27444 |
| 6  | 0.18583  | -2.07878 | -0.85124 |
| 6  | -1.23162 | 1.85047  | -0.98802 |
| 6  | 3.0363   | 1.42494  | -1.67033 |
| 1  | 2.0893   | 1.34745  | -2.20874 |
| 1  | 3.19452  | 2.48188  | -1.4243  |
| 1  | 3.83565  | 1.11476  | -2.34776 |
| 6  | -2.91284 | -1.9667  | -1.93428 |
| 1  | -2.97088 | -3.05796 | -1.86659 |
| 1  | -3.79702 | -1.61012 | -2.46874 |
| 1  | -2.0304  | -1.72548 | -2.53142 |
| 6  | -4.1328  | 0.15785  | 2.85317  |
| 1  | -4.61612 | -0.66613 | 3.38692  |
| 1  | -3.42568 | 0.63283  | 3.5362   |
| 1  | -4.90613 | 0.89095  | 2.60445  |
| 6  | 4.35999  | -1.67071 | 2.52898  |
| 1  | 3.64939  | -2.19416 | 3.17209  |
| 1  | 5.02173  | -2.41836 | 2.08116  |
| 1  | 4.97324  | -1.02138 | 3.16157  |
| 6  | -0.4829  | -3.32076 | -0.68847 |
| 7  | -0.98865 | -4.35456 | -0.56747 |
| 6  | 1.41983  | -2.17027 | -1.55359 |
| 7  | 2.38104  | -2.30505 | -2.18244 |
| 6  | 0.76085  | 2.66731  | 0.31795  |
| 1  | 1.66377  | 2.33403  | 0.81973  |
| 6  | -1.91187 | 3.00454  | -1.21796 |
| 1  | -2.81382 | 2.89076  | -1.81398 |
| 6  | 0.52256  | 4.00418  | 0.39363  |
| 1  | 1.26542  | 4.56883  | 0.95159  |
| 6  | -0.55216 | 4.78852  | -0.12445 |
| 1  | -0.49481 | 5.85471  | 0.07588  |
| 6  | -1.62391 | 4.34835  | -0.82992 |
| 1  | -2.34497 | 5.09432  | -1.1521  |
| 1  | -1.66954 | 0.9751   | -1.45231 |

## **6. Transition state TSA**

### **6.1 Representation of the imaginary vibrational mode (264i cm<sup>-1</sup>)**

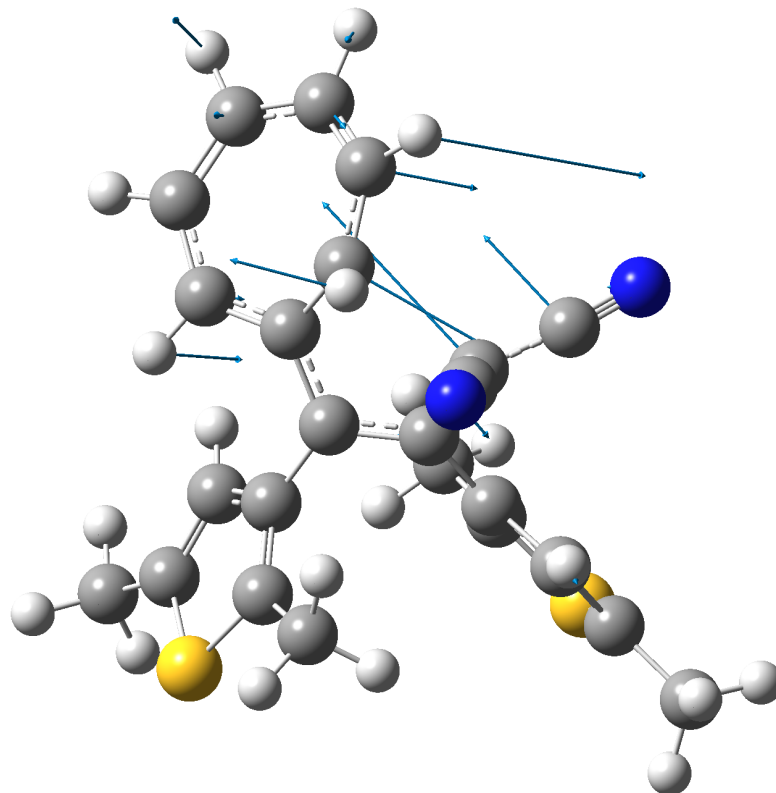

### **6.2 Cartesian coordinates**

|   |              |               |               |
|---|--------------|---------------|---------------|
| C | 0.0838022352 | -0.1583494338 | -0.0762360456 |
| C | 0.1594414766 | -0.2538307084 | 1.3086715763  |
| C | 1.4577479863 | -0.0189349164 | 1.8716912082  |
| C | 1.6156180317 | 0.4137168085  | 3.18335942    |
| H | 0.8023382595 | 0.164290293   | 3.8600852495  |
| C | 2.6148630416 | 1.2342565417  | 3.7190195446  |
| H | 2.4998895533 | 1.4760911339  | 4.771943921   |
| C | 3.6386946405 | 1.8843306878  | 3.0542217563  |
| H | 4.2002697149 | 2.6123235882  | 3.6330147417  |
| C | 4.0831448248 | 1.6698750067  | 1.743576381   |
| H | 4.9349670517 | 2.2641951711  | 1.4251105717  |
| C | 3.7070414721 | 0.6434070529  | 0.8980737787  |
| H | 4.3724884083 | 0.4482587226  | 0.05909375    |
| C | 2.6213621019 | -0.2357529612 | 1.0108114782  |
| H | 2.8036995507 | -1.2584072144 | 0.704414633   |
| C | 1.2879089123 | -0.3728349439 | -0.8731389009 |
| C | 1.7301447667 | -1.7030369718 | -1.0855031718 |
| N | 2.0951498194 | -2.7959268864 | -1.2113691663 |
| C | 1.5730067395 | 0.5373525708  | -1.9297404935 |
| N | 1.8715077441 | 1.3138577811  | -2.7345194797 |

|   |               |               |               |
|---|---------------|---------------|---------------|
| C | -1.1238736619 | 0.2397526578  | -0.8082149299 |
| C | -1.8992966717 | 1.3491350661  | -0.5558561088 |
| C | -1.7232666301 | 2.4224779551  | 0.4612194135  |
| H | -0.7031775812 | 2.4058361271  | 0.8501061875  |
| H | -2.4059812706 | 2.2892385096  | 1.3058293435  |
| H | -1.9047527796 | 3.4093988924  | 0.0276838976  |
| S | -3.1828851381 | 1.456543733   | -1.7039329305 |
| C | -2.6896321942 | 0.0184014545  | -2.5407658775 |
| C | -3.4453887098 | -0.4903176048 | -3.7204556387 |
| H | -2.9539338326 | -1.3827301996 | -4.113200185  |
| H | -4.4741952168 | -0.7579786409 | -3.4604342307 |
| H | -3.4880918391 | 0.2514149757  | -4.5237865952 |
| C | -1.5749528656 | -0.4929910562 | -1.9574475226 |
| H | -1.081984446  | -1.389217419  | -2.317076724  |
| C | -1.0560114483 | -0.3705090267 | 2.1409818369  |
| C | -1.9119855566 | -1.4384709568 | 2.0123834736  |
| C | -1.8443039875 | -2.5946763397 | 1.0731056436  |
| H | -0.8101109161 | -2.7952845838 | 0.7849402741  |
| H | -2.2518197247 | -3.5018664075 | 1.525833649   |
| H | -2.4095746199 | -2.3903645114 | 0.1572887424  |
| S | -3.2236029917 | -1.3053173787 | 3.128362242   |
| C | -2.6419680841 | 0.1887195366  | 3.781216785   |
| C | -3.3775524638 | 0.9075807629  | 4.8609852925  |
| H | -2.8450831737 | 1.8246721878  | 5.1224107573  |
| H | -4.389668093  | 1.1836530661  | 4.5495874421  |
| H | -3.4653410944 | 0.300256325   | 5.7671655957  |
| C | -1.4870315815 | 0.5475133047  | 3.1562364614  |
| H | -0.9716538058 | 1.471508225   | 3.3896119036  |



## **7. Transition state TSB**

### **7.1 Representation of the imaginary vibrational mode (121i cm<sup>-1</sup>)**

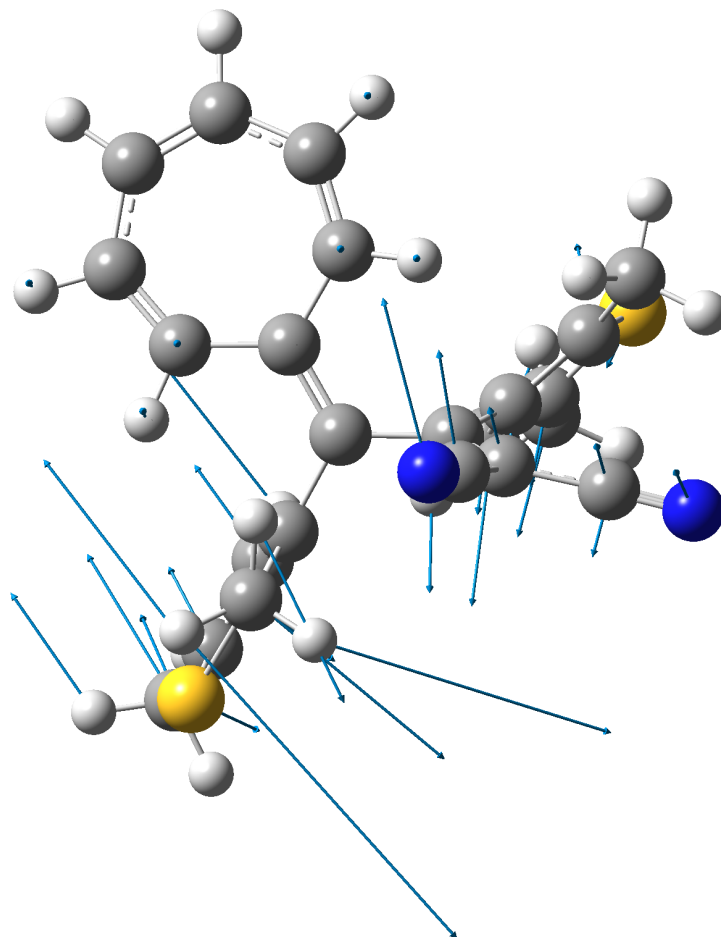

### **7.2 Cartesian coordinates**

|   |               |               |               |
|---|---------------|---------------|---------------|
| C | -0.0105936748 | -0.0379590809 | -0.0002074223 |
| C | -0.0147007781 | -0.0377698991 | 1.4938323239  |
| C | 1.1640268581  | 0.0120394594  | 2.193150228   |
| C | 1.1241089804  | 0.0731578723  | 3.6467304034  |
| H | 0.1389182936  | -0.1104511651 | 4.0689466452  |
| C | 2.1029511281  | 0.3457578875  | 4.5408747014  |
| H | 1.7871889559  | 0.356467174   | 5.5827268198  |
| C | 3.4911523582  | 0.648207487   | 4.3346833421  |
| H | 4.0405360639  | 0.95223171    | 5.2232514501  |
| C | 4.1893479661  | 0.554563039   | 3.1795211204  |
| H | 5.251332732   | 0.7871532104  | 3.2191252962  |
| C | 3.6975964348  | 0.1252004567  | 1.9011924217  |
| H | 4.46757876    | -0.023291158  | 1.1458548304  |

|   |               |               |               |
|---|---------------|---------------|---------------|
| C | 2.4319863584  | -0.1168375513 | 1.4888754152  |
| H | 2.3439475667  | -0.4622811162 | 0.4623347249  |
| C | -0.3251620071 | -1.1527729309 | -0.7338368551 |
| C | -0.6120138071 | -1.0935545545 | -2.1296999016 |
| N | -0.8734177028 | -1.0901613853 | -3.2550783765 |
| C | -0.3358319333 | -2.4712828572 | -0.1965614868 |
| N | -0.2842845579 | -3.5696725579 | 0.1572810058  |
| C | 0.3522589383  | 1.1961502391  | -0.702184872  |
| C | 1.2852950296  | 1.2607065417  | -1.7238305817 |
| C | 2.1177024448  | 0.2024421981  | -2.3637567654 |
| H | 2.1651611803  | -0.6958424046 | -1.7425121002 |
| H | 3.1382758936  | 0.5572121969  | -2.534258276  |
| H | 1.6944098095  | -0.0959092303 | -3.3302516081 |
| S | 1.5039416475  | 2.8953670264  | -2.2264884201 |
| C | 0.3330910355  | 3.5055319017  | -1.0992926329 |
| C | -0.0140069949 | 4.9540703549  | -1.0520173265 |
| H | -0.74329204   | 5.1306140605  | -0.2574970519 |
| H | 0.8658715062  | 5.5742384725  | -0.8500129725 |
| H | -0.4517822236 | 5.2951307084  | -1.9963132953 |
| C | -0.1668104629 | 2.4869802925  | -0.355191759  |
| H | -0.9408397588 | 2.6354061692  | 0.3872609314  |
| C | -1.3274993175 | 0.1387339848  | 2.1871048274  |
| C | -2.1847844668 | -0.8469710298 | 2.6122447674  |
| C | -2.0764828736 | -2.3326911257 | 2.5446437391  |
| H | -1.0300630751 | -2.6365994063 | 2.4854673891  |
| H | -2.5151689072 | -2.7931740203 | 3.4348177591  |
| H | -2.5909132345 | -2.7453207945 | 1.6708821513  |
| S | -3.5560418993 | -0.1555737922 | 3.4173619423  |
| C | -2.9780472774 | 1.4642317509  | 3.2242937611  |
| C | -3.7382788637 | 2.6345107765  | 3.7499246861  |
| H | -3.1745945242 | 3.552638002   | 3.5649294716  |
| H | -4.7149481186 | 2.7338723338  | 3.2637633908  |
| H | -3.9122438524 | 2.5552427946  | 4.8283995193  |
| C | -1.7886802495 | 1.4472296375  | 2.5643562066  |
| H | -1.2155570956 | 2.3509521274  | 2.3806299837  |

## **8. Transition state TSC**

### **8.1 Representation of the imaginary vibrational mode (741i cm<sup>-1</sup>)**

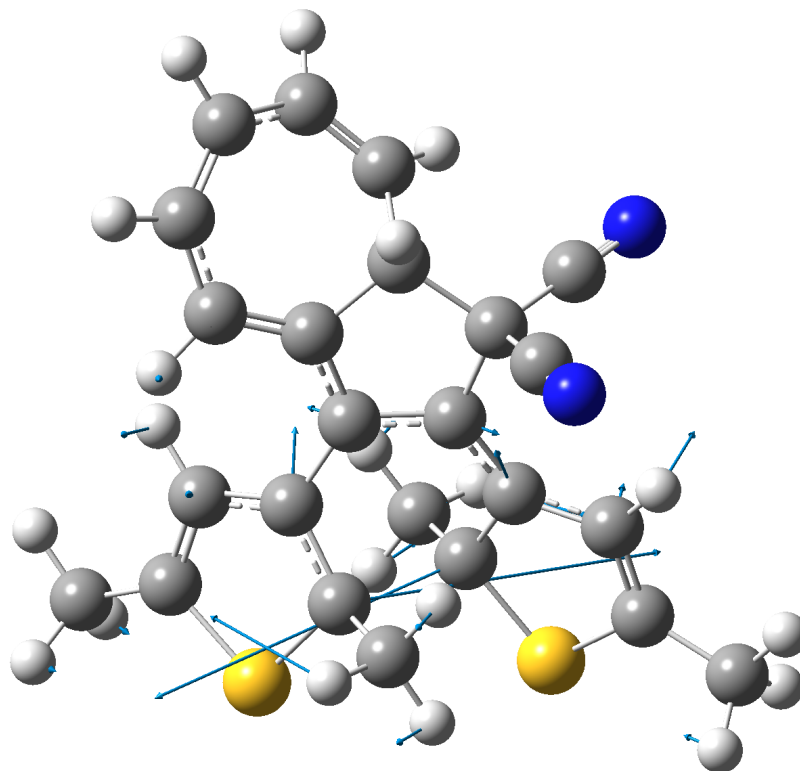

### **8.2 Cartesian coordinates**

|   |              |               |               |
|---|--------------|---------------|---------------|
| C | 0.0198588243 | 0.0116302772  | 0.0362230927  |
| C | 0.0228337251 | -0.0701435096 | 1.4230147503  |
| C | 1.3584821663 | -0.1281010368 | 1.9324405007  |
| C | 1.7832147937 | -0.3512874234 | 3.2100854474  |
| H | 1.0426553842 | -0.6330681738 | 3.9539808157  |
| C | 3.1371812319 | -0.2284553613 | 3.6437828688  |
| H | 3.3919702577 | -0.7296149077 | 4.5744483492  |
| C | 4.0936361453 | 0.5836524094  | 3.1003336677  |
| H | 5.0362396432 | 0.661010661   | 3.6359592984  |
| C | 3.9067360376 | 1.4899800394  | 1.9988326764  |
| H | 4.4947151029 | 2.4048671497  | 2.0211909014  |
| C | 3.0562620632 | 1.3154256003  | 0.9700290358  |
| H | 2.9026006429 | 2.1109781919  | 0.2467528237  |
| C | 2.343144738  | 0.0092127119  | 0.7986955029  |
| H | 3.0772691243 | -0.8037043272 | 0.835774715   |
| C | 1.4491321922 | -0.1437972483 | -0.4893309923 |
| C | 1.630937638  | -1.4935133855 | -1.0440809522 |
| N | 1.7515121066 | -2.5665539202 | -1.4462838756 |

|   |               |               |               |
|---|---------------|---------------|---------------|
| C | 1.7584263931  | 0.8340159739  | -1.5362227316 |
| N | 1.9976022553  | 1.6162335548  | -2.3467188189 |
| C | -1.1539791263 | 0.0962773689  | -0.7611259418 |
| C | -2.3844565482 | 0.5810749239  | -0.1541763478 |
| C | -2.4585098965 | 1.9717112208  | 0.424473719   |
| H | -1.6076871724 | 2.1657160951  | 1.0781378178  |
| H | -3.3781862019 | 2.1136864634  | 0.9984290044  |
| H | -2.4415992259 | 2.7081908314  | -0.383734122  |
| S | -3.7124472886 | 0.2202334955  | -1.2810636906 |
| C | -2.6515958759 | -0.522875842  | -2.450916834  |
| C | -3.2002688668 | -1.149412218  | -3.6826393104 |
| H | -2.3880786591 | -1.5450846246 | -4.2955729004 |
| H | -3.8800420998 | -1.9740994797 | -3.4425446763 |
| H | -3.7626800349 | -0.4285924234 | -4.2850633071 |
| C | -1.3486656736 | -0.4817849616 | -2.0378324041 |
| H | -0.5542415799 | -0.9343269435 | -2.6210478657 |
| C | -1.2208630652 | -0.0900875527 | 2.1694765904  |
| C | -2.4105772316 | -0.6163330214 | 1.5401596987  |
| C | -2.4625344251 | -1.9971658371 | 0.9381607402  |
| H | -1.6023763394 | -2.1696982734 | 0.2898221267  |
| H | -2.447353023  | -2.7493862808 | 1.7315733844  |
| H | -3.3723779438 | -2.1363196812 | 0.3484770419  |
| S | -3.783755675  | -0.2343912376 | 2.5961658807  |
| C | -2.8027306319 | 0.6645654786  | 3.7218564244  |
| C | -3.4175701341 | 1.392851857   | 4.8631597615  |
| H | -2.6404415802 | 1.8645178334  | 5.4681516446  |
| H | -3.9918247424 | 0.7221911     | 5.5108814057  |
| H | -4.1017708411 | 2.1759604167  | 4.518147132   |
| C | -1.4804073526 | 0.6270816492  | 3.3509193956  |
| H | -0.7135013106 | 1.1656861878  | 3.8969330769  |

## **9. Transition state TSD**

### **9.1 Representation of the imaginary vibrational mode (691i cm<sup>-1</sup>)**

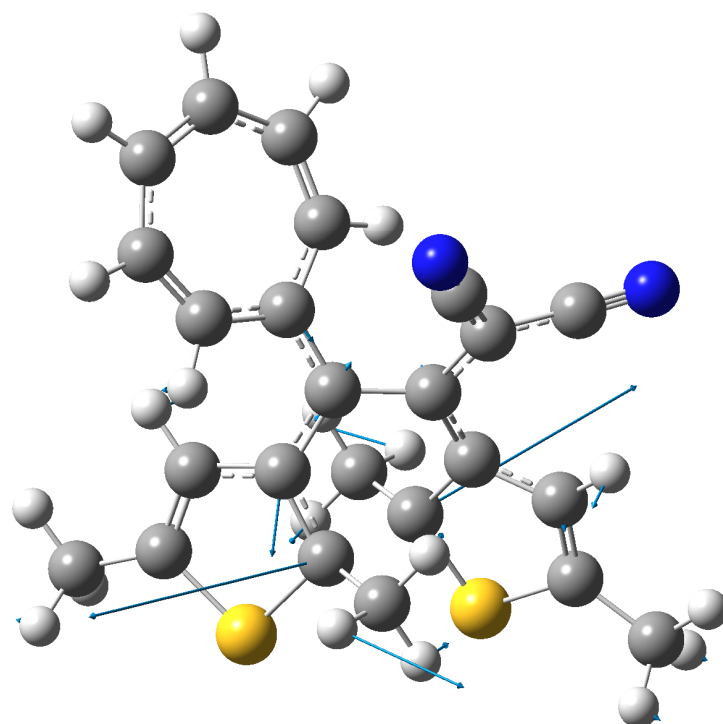

### **9.2 Cartesian coordinates**

|   |               |               |               |
|---|---------------|---------------|---------------|
| C | -0.0017765717 | 0.2830393233  | 0.1010240795  |
| C | 0.0033234451  | -0.0254570277 | 1.5538610167  |
| C | 1.233141851   | -0.0389461542 | 2.260979562   |
| C | 2.4440229365  | 0.493928389   | 1.6585894172  |
| C | 1.5217262663  | -0.8978603587 | 3.3707168673  |
| S | 3.8320132824  | -0.0602995634 | 2.6162720463  |
| C | 2.8321818676  | -1.0337639791 | 3.6802466065  |
| H | 0.7605948422  | -1.4674889069 | 3.8944713157  |
| C | 1.2575309051  | 0.1718877601  | -0.5994692404 |
| C | 2.3835148822  | -0.5404039519 | -0.0562415879 |
| C | 1.6264611057  | 0.9902786608  | -1.6967722068 |
| S | 3.81690679    | -0.1746753578 | -1.042907134  |
| C | 2.9475420182  | 0.9277116378  | -2.0475358635 |
| H | 0.9455231539  | 1.6873351807  | -2.1767008706 |
| C | 2.3104719618  | -1.9912569358 | 0.3466533977  |
| H | 3.1912710903  | -2.2851827972 | 0.925957132   |
| H | 1.4147038044  | -2.1894026159 | 0.9362122415  |
| H | 2.2674224651  | -2.6142886217 | -0.5518597159 |
| C | 2.5642401674  | 1.9440902017  | 1.2599176396  |
| H | 2.6554111659  | 2.5427389734  | 2.1709620431  |

|   |               |               |               |
|---|---------------|---------------|---------------|
| H | 3.4516569846  | 2.1232121724  | 0.6454355829  |
| H | 1.6779927197  | 2.2828539998  | 0.7224274019  |
| C | 3.4583519168  | -1.9036834022 | 4.7103623786  |
| H | 4.0717905791  | -1.3241734075 | 5.4100382442  |
| H | 2.6813058448  | -2.4154427696 | 5.2836677649  |
| H | 4.1082623561  | -2.6614988781 | 4.25609882    |
| C | 3.643783144   | 1.7398754507  | -3.0802480891 |
| H | 4.3927093374  | 2.3980504002  | -2.6247004569 |
| H | 4.166714505   | 1.1025271229  | -3.8017185025 |
| H | 2.9241875973  | 2.357667757   | -3.6222444316 |
| C | -1.19526965   | -0.4241100728 | 2.1743390154  |
| C | -2.2882430453 | -0.9678935463 | 1.4563295677  |
| C | -1.3932413605 | -0.3514954239 | 3.5724055648  |
| N | -3.1944901558 | -1.4580639615 | 0.9260627708  |
| N | -1.5967590881 | -0.2740933609 | 4.7109531176  |
| C | -1.1390573443 | 0.8030344543  | -0.5477576266 |
| C | -1.3318003077 | 0.4948103161  | -1.9428734499 |
| C | -2.0639242732 | 1.6391998048  | 0.1824974686  |
| C | -2.309796574  | 0.8527610325  | -2.8177763026 |
| H | -0.5927832341 | -0.1927166158 | -2.3482869599 |
| H | -1.7790634222 | 1.8298465342  | 1.2135221851  |
| C | -3.1917457095 | 2.282930348   | -0.2172859196 |
| H | -2.217842824  | 0.4217706261  | -3.8128967675 |
| C | -3.462256674  | 1.6796009488  | -2.6282063602 |
| H | -3.6682970953 | 2.8909196379  | 0.5492507029  |
| C | -3.8479146576 | 2.3061950542  | -1.4897109377 |
| H | -4.0981066581 | 1.804730857   | -3.5020614564 |
| H | -4.7582084268 | 2.9000688171  | -1.5354754724 |

## **10. Transition state TSE**

### **10.1 Representation of the imaginary vibrational mode (118i cm<sup>-1</sup>)**

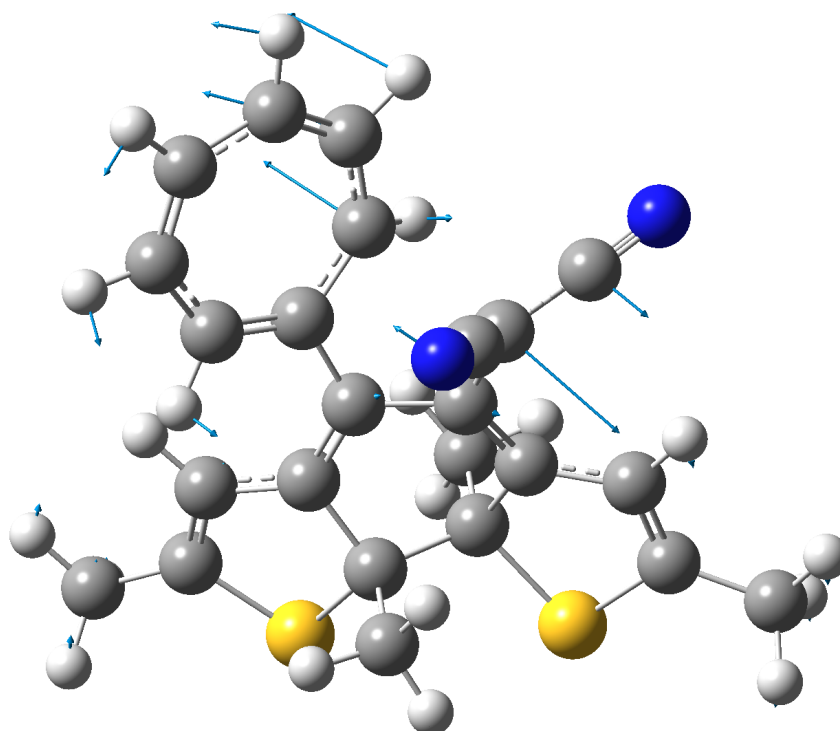

### **10.2 Cartesian coordinates**

|   |              |               |               |
|---|--------------|---------------|---------------|
| C | 0.0120163305 | 0.025586211   | -0.0193004068 |
| C | 0.0069776631 | 0.028255679   | 1.453093792   |
| C | 1.179689968  | 0.006635385   | 2.1374824853  |
| C | 2.4865441756 | 0.1275712661  | 1.3576341354  |
| C | 1.4048882999 | -0.1306314627 | 3.5462253572  |
| S | 3.795858689  | -0.4531392035 | 2.5291597524  |
| C | 2.6870966239 | -0.3716036476 | 3.8951543304  |
| H | 0.6075249546 | -0.0810714996 | 4.2826443096  |
| C | 1.1626074884 | -0.2554180881 | -0.7022984628 |
| C | 2.3662251338 | -0.7436773334 | 0.0987427082  |
| C | 1.4616461352 | -0.1103934017 | -2.090015876  |
| S | 3.8118591288 | -0.5753832093 | -1.0436842605 |
| C | 2.7732230499 | -0.2451504925 | -2.409681785  |
| H | 0.7200013661 | 0.1489146907  | -2.8397822031 |
| C | 2.1774141403 | -2.2401223112 | 0.3895869509  |
| H | 3.0468462235 | -2.6482784042 | 0.9087650928  |
| H | 1.2905976139 | -2.3958419472 | 1.0104165677  |

|   |               |               |               |
|---|---------------|---------------|---------------|
| H | 2.0448966124  | -2.7766416757 | -0.5531094966 |
| C | 2.7534289348  | 1.6099097362  | 1.0629440862  |
| H | 2.7358674734  | 2.1679117454  | 2.0022445868  |
| H | 3.7266983278  | 1.7510115098  | 0.5883329093  |
| H | 1.9769324127  | 2.0118928059  | 0.4047451171  |
| C | 3.225230763   | -0.5807777559 | 5.2646258066  |
| H | 3.97429979    | 0.180991128   | 5.5102076967  |
| H | 2.4198192057  | -0.5294871454 | 6.0008152626  |
| H | 3.7157301369  | -1.5574249605 | 5.3492728638  |
| C | 3.3776314735  | -0.124194422  | -3.7622247026 |
| H | 2.6131083624  | 0.1171148017  | -4.504030894  |
| H | 4.1438701031  | 0.6591999466  | -3.7793477833 |
| H | 3.8668017727  | -1.0609262675 | -4.0535154862 |
| C | -1.3370042187 | 0.0783537115  | 2.0676036897  |
| C | -2.2242380616 | -0.9945298812 | 1.8429162606  |
| C | -1.5960105231 | 0.9126358341  | 3.1716696722  |
| N | -2.9513090546 | -1.8626582567 | 1.5882480464  |
| N | -1.8134976975 | 1.6466739566  | 4.0447422865  |
| C | -1.281274941  | 0.3791999317  | -0.5962529186 |
| C | -1.7864503549 | -0.3025592526 | -1.6822745537 |
| C | -1.9755345493 | 1.3560882599  | 0.2036275404  |
| C | -3.059531524  | -0.2328677451 | -2.2851707903 |
| H | -1.1121994205 | -1.0342500238 | -2.1224763643 |
| H | -1.3385606807 | 2.0532679024  | 0.739693758   |
| C | -3.3325062101 | 1.7197984104  | 0.1272676918  |
| H | -3.1805738741 | -0.8481269352 | -3.1744694125 |
| C | -4.1804996183 | 0.4356589651  | -1.857860784  |
| H | -3.6437645162 | 2.4653533511  | 0.8574404456  |
| C | -4.3086941819 | 1.2822690471  | -0.7387339417 |
| H | -5.0820422293 | 0.2942733819  | -2.4497025228 |
| H | -5.3005191237 | 1.7011139217  | -0.5802600426 |



Table S1. Computed dipole moments (D) and Merz-Kollman (MK) charges for the fragments of **DHA**, **VHFcis** and **VHFtrans**. All values are computed at the PCM(toluenes)-CAM-B3LYP/6-311+G(2d,p)//PCM-PBE0/6-311G(d,p) level and reported for both the ground ( $S_0$ ) and first excited ( $S_1$ ) states.

| Form            | State | MK charges |       |       |      | Dipole moment |
|-----------------|-------|------------|-------|-------|------|---------------|
|                 |       | I          | II    | III   | IV   |               |
| <b>DHA</b>      | $S_0$ | 0.17       | -0.15 | -0.12 | 0.10 | 5.5           |
|                 | $S_1$ | 0.27       | -0.28 | -0.12 | 0.13 | 6.0           |
| <b>VHFcis</b>   | $S_0$ | 0.61       | -0.12 | -0.57 | 0.08 | 10.0          |
|                 | $S_1$ | 0.61       | -0.08 | -0.58 | 0.04 | 10.0          |
| <b>VHFtrans</b> | $S_0$ | 0.54       | -0.07 | -0.58 | 0.11 | 13.6          |
|                 | $S_1$ | 0.48       | -0.01 | -0.60 | 0.13 | 15.1          |

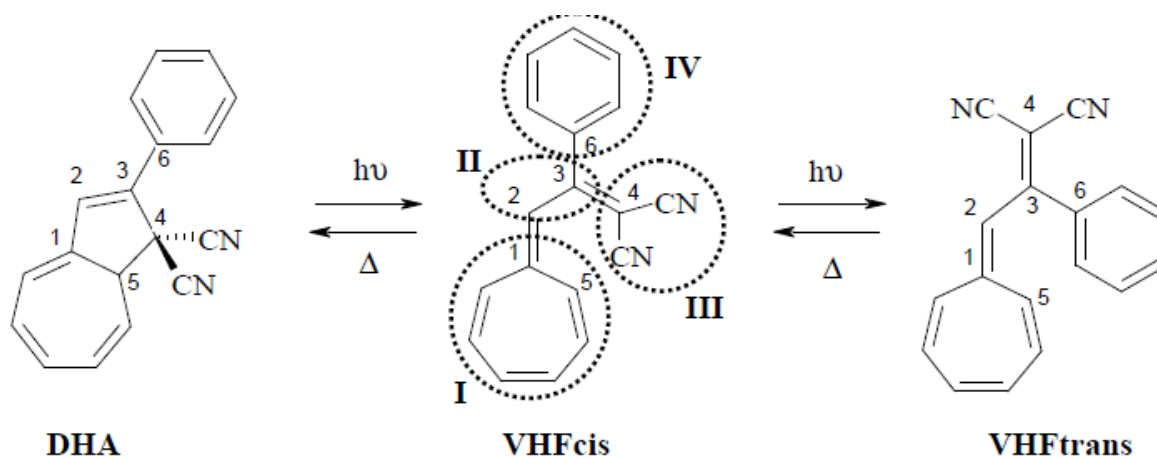

Table S2. Computed dipole moments (D) and Merz-Kollman (MK) charges for the different fragments of the hybrid system. Values are computed at the PCM(toluene)-CAM-B3LYP/6-311+G(2d, p)//PCM-PBE0/6-311G(d,p) level for the ground state  $S_0$  as well as for the vertical  $S_1$  state.

| Form               | State | MK charges |       |       |       | Dipole moment |
|--------------------|-------|------------|-------|-------|-------|---------------|
|                    |       | I          | II    | III   | IV    |               |
| <b>Do-DHA</b>      | $S_0$ | 0.21       | 0.76  | -0.73 | -0.25 | 5.9           |
|                    | $S_1$ | 0.23       | 0.49  | -0.69 | -0.03 | 6.3           |
| <b>Dc-DHA</b>      | $S_0$ | 0.12       | -0.01 | -0.32 | 0.21  | 6.1           |
|                    | $S_1$ | 0.04       | 0.07  | -0.33 | 0.21  | 6.6           |
| <b>Do-VHFcis</b>   | $S_0$ | 0.68       | 0.00  | -0.67 | 0.00  | 9.3           |
|                    | $S_1$ | 0.65       | 0.08  | -0.73 | 0.00  | 11.0          |
| <b>Do-VHFtrans</b> | $S_0$ | 0.18       | 0.01  | 0.32  | -0.51 | 12.2          |
|                    | $S_1$ | 0.20       | 0.17  | 0.34  | -0.70 | 14.0          |
| <b>Dc-VHF</b>      | $S_0$ | 0.64       | 0.09  | -0.86 | 0.13  | 13.3          |
|                    | $S_1$ | 0.37       | 0.08  | -0.63 | 0.18  | 7.4           |

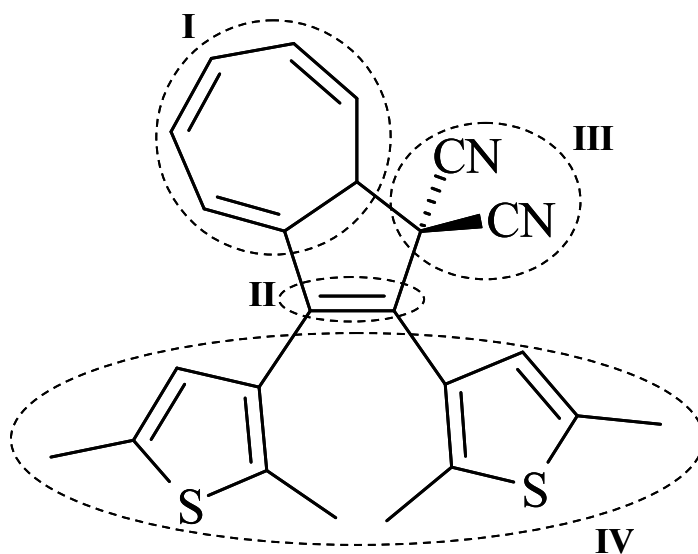

Supplement: c1cp21007f.pdf [file c1cp21007f.pdf]
